# Supplementary material for: Effects of Full-Length Kisspeptin Administration on Follicular Development in Japanese Black Beef Cows
Source: PubMed Central journal article supplement — J Reprod Dev. 2013 Oct 10;59(6):588–94. doi: 10.1262/jrd.2013-064 (PMC3934150; doi:10.1262/jrd.2013-064), 2013-10-10
Supplement: jrd-59-588-s001.pdf [file jrd-59-588-s001.pdf]

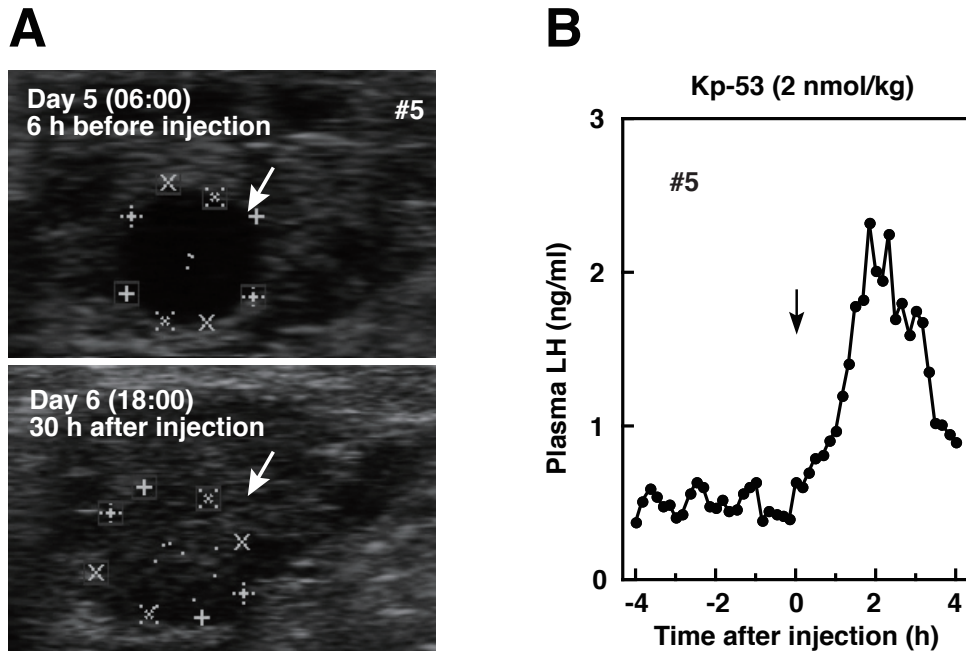

Fig. S1. Effects of full-length kisspeptin (Kp-53) injection on ovarian follicles and LH secretion in an ovulatory cow. (A) Ultrasound images of the ovary before (at 0600 h on Day 5) and after (at 1800 h on Day 6) ovulation in a Kp-53-treated cow. White arrows indicate the first dominant follicle. (B) Representative profiles of plasma LH concentrations before and after the injection of Kp-53 in an ovulatory cow. The arrow indicates the time of intravenous injection of Kp-53 (2 nmol/kg).
